# Supplementary material for: Plasmodium falciparumandPlasmodium vivaxPrevalence in Ethiopia: A Systematic Review and Meta-Analysis
Source: Hindawi journal article supplement (doi:10.1155/2019/7065064), 2019-12-03
Supplement: f1 [file 7065064.f1.pdf]

Fig. S1. Malaria prevalence trend analysis in Ethiopia

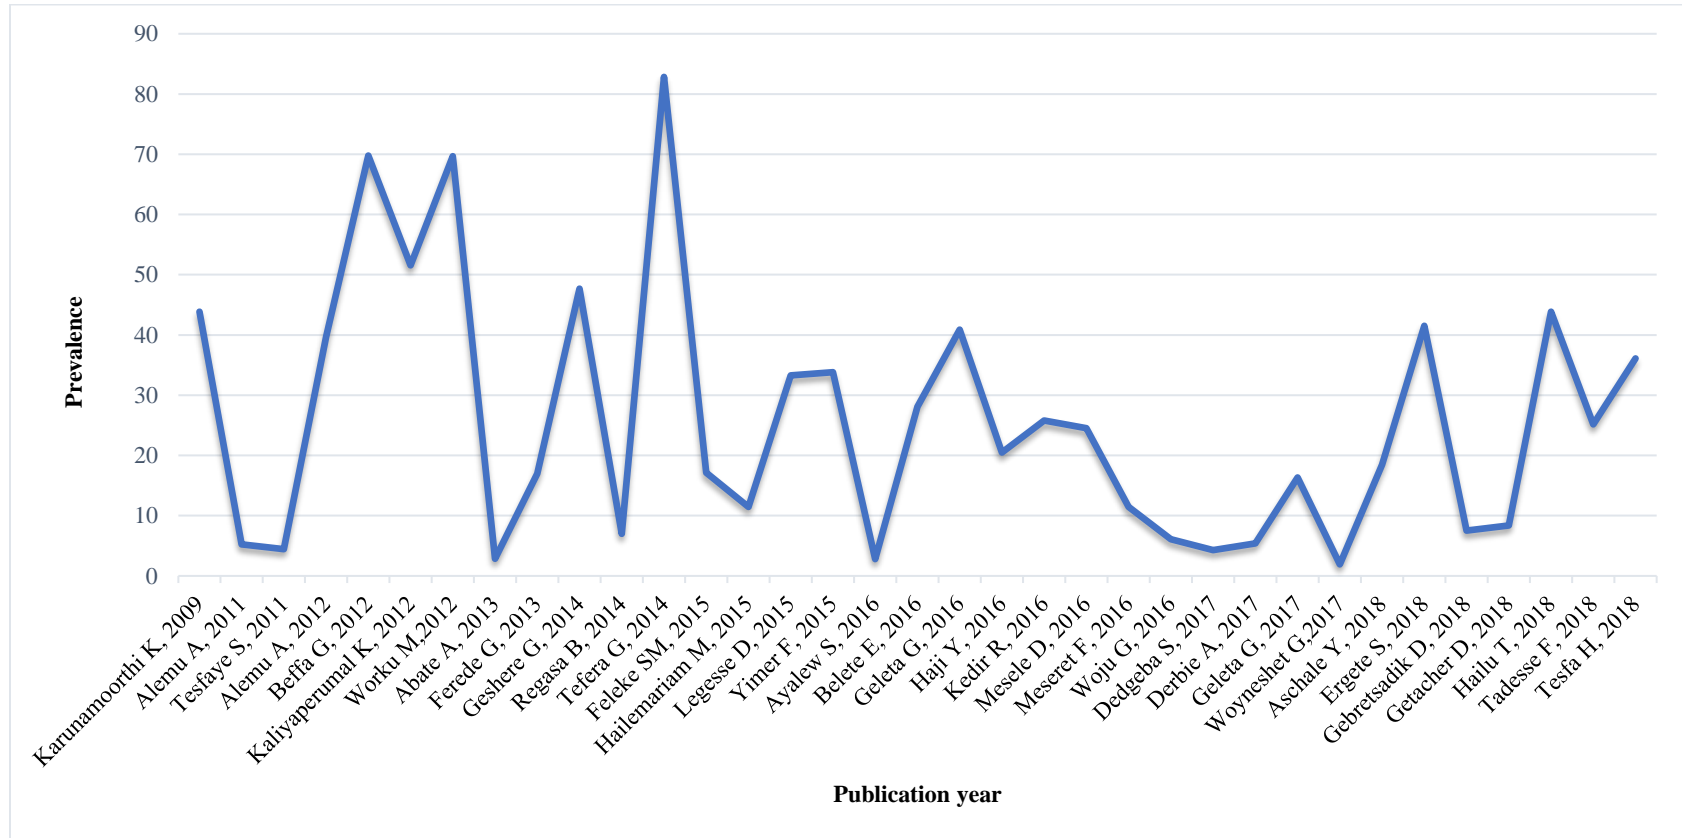

FIGURE: Time trend analysis of malaria prevalence in Ethiopia from 2009 to 2018.

Fig. S2. Funnel plots of malaria prevalences in Ethiopia

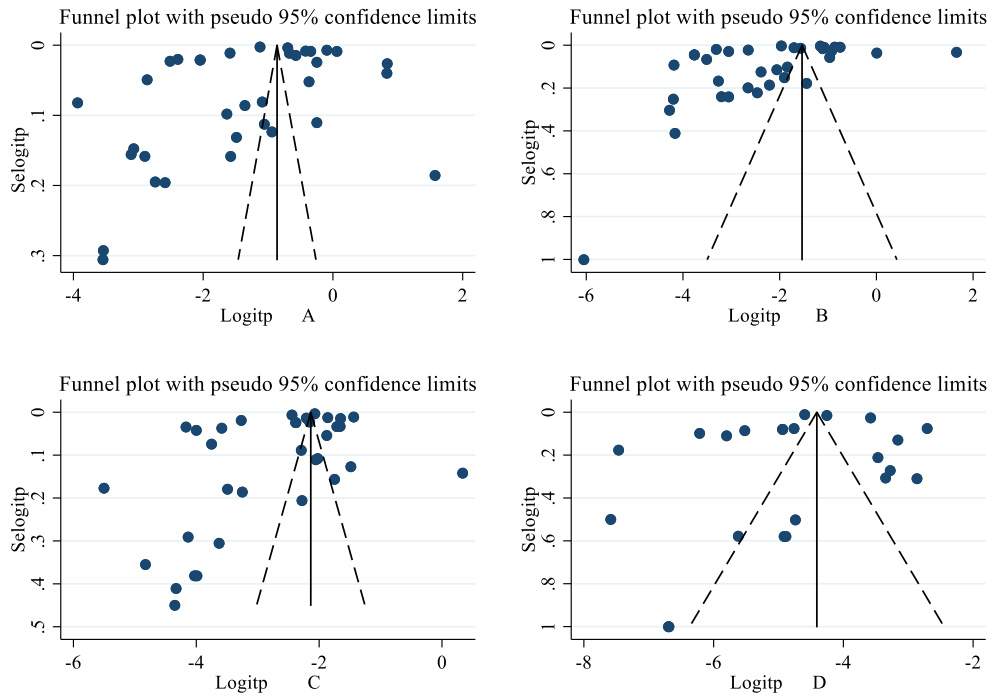

FIGURE: Funnel plots of logit event estimated (logitp) of combined (A), *P. falciparum* (B), *P. vivax* (C), and mixed infections (D) in Ethiopia, 2019.
